# Supplementary material for: School academic performance of children hospitalised with a chronic condition
Source: PubMed Central journal article supplement — Arch Dis Child. 2021 Sep 2;107(3):289–96. doi: 10.1136/archdischild-2020-321285 (PMC8862027; doi:10.1136/archdischild-2020-321285), 2021-09-02
Supplement: archdischild-2020-321285supp001.pdf [file archdischild-2020-321285supp001.pdf]

## Supplementary materials

### Data linkage

Individual records for each child were linked across datasets of birth and perinatal circumstances (the Perinatal Data Collection, PDC), inpatient admissions hospital inpatient admissions (the Admitted Patient Data Collection, APDC), and school assessment (the National Assessment Program-Literacy and Numeracy, NAPLAN) using a probabilistic approach by the NSW Centre for Health Record Linkage with de-identified data provided to the researchers. A data quality review conducted in 2012 in NSW showed the rate of data linkage error was 3/1000 linkage keys.<sup>1</sup>

The researchers have examined the missing records and removed the duplicate records which were considered to occur when the records have the same patient ID and the same visit ID. In addition, hospital inpatient admissions were considered to represent a transferral episode if the admission start date is before the discharge date of the previous admission episode. The transferral episodes were not considered as a new episode of admissions in the analyses.

### NAPLAN data

NAPLAN data were unavailable for children who were absent (e.g., physically unwell on the testing day), exempt (e.g., significant intellectual disability that severely limits students' capacity to participate in a test), or withdrawn (e.g., parents holding religious or philosophical objections to testing) from the test. The National Report for NAPLAN 2014 shows that between 2009 and 2014 in NSW, 3.7-5.3% children performed BNMS in reading and 3.5-4.6% in numeracy in Grade 3; 3.2-8% and 4.5-6% in Grade 5 respectively; 4.6-5.3% and 4.5-6.2% in Grade 7 respectively.<sup>2</sup> These results are similar to our findings (Supplementary Tables 9-13). NAPLAN reports both continuous and band scores. We considered as the outcome the national minimum standard (NMS) derived from band scores, because it facilitates the interpretation of the policy and practical implications of the findings. Last, the NAPLAN results can be used to predict subsequent access to tertiary education.<sup>3</sup>

**Supplementary Figure 1** Study design flowchart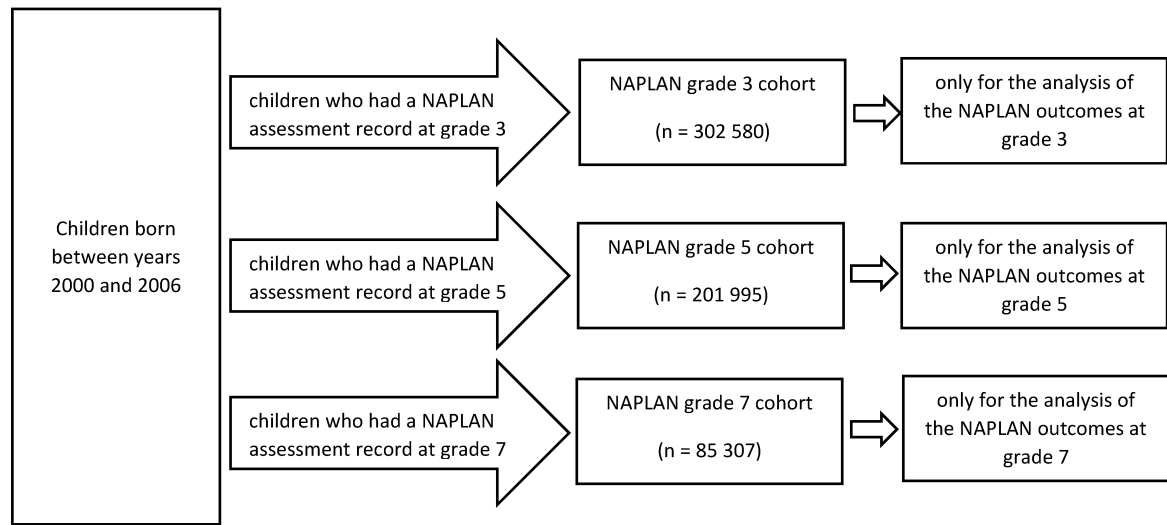

**Supplementary Table 1** Types of chronic condition identified using Hardelid et al.'s classification system.<sup>4</sup>

| <b>Types of chronic condition</b>                  | <b>Sub-categories</b>                                   |
|----------------------------------------------------|---------------------------------------------------------|
| Mental health/behavioural                          | Substance abuse                                         |
|                                                    | Self-harm                                               |
|                                                    | Other mental health problems                            |
|                                                    | Behavioural/developmental disorders                     |
| Cancer/blood disorders                             | Neoplasms                                               |
|                                                    | Immunological disorders                                 |
|                                                    | Anaemia and other blood disorders                       |
| Chronic infections                                 | HIV                                                     |
|                                                    | Tuberculosis                                            |
|                                                    | Other                                                   |
| Respiratory                                        | Asthma and chronic lower respiratory disease            |
|                                                    | Cystic fibrosis                                         |
|                                                    | Injuries                                                |
|                                                    | Congenital anomalies                                    |
|                                                    | Other                                                   |
| Metabolic/endocrine/digestive/renal/ genitourinary | Diabetes                                                |
|                                                    | Other endocrine                                         |
|                                                    | Metabolic                                               |
|                                                    | Digestive                                               |
|                                                    | Renal/GU                                                |
|                                                    | Congenital anomalies of the digestive/renal/GU system   |
|                                                    | Injuries                                                |
|                                                    | Other/unspecific                                        |
| Musculoskeletal/skin                               | Musculoskeletal/connective tissue                       |
|                                                    | Skeletal injuries/amputations                           |
|                                                    | Chronic skin disorders                                  |
|                                                    | Congenital anomalies                                    |
| Neurological                                       | Epilepsy                                                |
|                                                    | Cerebral palsy                                          |
|                                                    | Injuries of brain, nerves, eyes or ears                 |
|                                                    | Chronic eye conditions                                  |
|                                                    | Chronic ear conditions                                  |
|                                                    | Perinatal conditions                                    |
|                                                    | Congenital anomalies of neurological or sensory systems |
|                                                    | Other                                                   |
| Cardiovascular                                     | Congenital heart disease                                |
|                                                    | Other                                                   |
| Codes indicating non-specific chronic condition    | -                                                       |

**Supplementary Table 2** Number and percentage of children born in each year included in each grade cohort

| Year of birth | Number of children born in each year | School grade of NAPLAN assessment <sup>a</sup> |       |                |       |                |       |
|---------------|--------------------------------------|------------------------------------------------|-------|----------------|-------|----------------|-------|
|               |                                      | Grade 3 cohort                                 |       | Grade 5 cohort |       | Grade 7 cohort |       |
|               |                                      | N <sup>b</sup>                                 | Row % | N <sup>a</sup> | Row % | N <sup>a</sup> | Row % |
| <b>2000</b>   | 50411                                | 34751                                          | 68.94 | 47222          | 93.67 | 37652          | 74.69 |
| <b>2001</b>   | 49668                                | 49662                                          | 99.99 | 46563          | 93.75 | 36412          | 73.31 |
| <b>2002</b>   | 50071                                | 49870                                          | 99.60 | 46541          | 92.95 | 11236          | 22.44 |
| <b>2003</b>   | 67119                                | 50054                                          | 74.58 | 47255          | 70.40 | --             | 0.01  |
| <b>2004</b>   | 56761                                | 49569                                          | 87.33 | 14403          | 25.37 | --             | 0.00  |
| <b>2005</b>   | 52984                                | 52422                                          | 98.94 | 6              | 0.01  | --             | 0.00  |
| <b>2006</b>   | 70155                                | 16252                                          | 23.17 | --             | 0.01  | --             | 0.00  |

<sup>a</sup> NAPLAN data were available from 2009 to 2014.

<sup>b</sup> Number of children with a NAPLAN assessment record for each Grade cohort

-- Numbers from 1 to 5 are suppressed from presentation to protect individual confidentiality.

Supplementary Table 3 Characteristics of children with a NAPLAN record at grade 5

| Factors                                                                            | Children without recorded hospitalisations prior to NAPLAN assessment at Grade 5 | Children hospitalised without any chronic conditions prior to NAPLAN assessment at Grade 5 | Children hospitalised with a chronic condition prior to NAPLAN assessment at Grade 5 |
|------------------------------------------------------------------------------------|----------------------------------------------------------------------------------|--------------------------------------------------------------------------------------------|--------------------------------------------------------------------------------------|
|                                                                                    | n (Column %)                                                                     | n (Column %)                                                                               | n (Column %)                                                                         |
| <b>All</b>                                                                         | 91673 (100)                                                                      | 74903 (100)                                                                                | 35419 (100)                                                                          |
| <b>Child's sex</b>                                                                 |                                                                                  |                                                                                            |                                                                                      |
| Male                                                                               | 41207 (45)                                                                       | 40972 (54.7)                                                                               | 20893 (59)                                                                           |
| Female                                                                             | 50427 (55)                                                                       | 33904 (45.3)                                                                               | 14506 (41)                                                                           |
| Unknown                                                                            | 39 (0)                                                                           | 27 (0)                                                                                     | 20 (0.1)                                                                             |
| <b>Child perinatal factors</b>                                                     |                                                                                  |                                                                                            |                                                                                      |
| Gestational age (weeks)                                                            |                                                                                  |                                                                                            |                                                                                      |
| Pre-term birth (gestational age $\leq$ 36)                                         | 4709 (5.1)                                                                       | 5228 (7)                                                                                   | 3385 (9.6)                                                                           |
| Term birth (gestational age: 37-41)                                                | 84358 (92)                                                                       | 67820 (90.5)                                                                               | 31212 (88.1)                                                                         |
| Post-term birth (gestational age $\geq$ 42)                                        | 2599 (2.8)                                                                       | 1843 (2.5)                                                                                 | 818 (2.3)                                                                            |
| Missing                                                                            | 7 (0)                                                                            | 12 (0)                                                                                     | --                                                                                   |
| Birthweight by gestation                                                           |                                                                                  |                                                                                            |                                                                                      |
| Small for gestation (<10%)                                                         | 9823 (10.7)                                                                      | 8718 (11.6)                                                                                | 4375 (12.4)                                                                          |
| Birthweight by gestation: 10-90%                                                   | 72664 (79.3)                                                                     | 58871 (78.6)                                                                               | 27350 (77.2)                                                                         |
| Large for gestation ( $\geq$ 90%)                                                  | 9058 (9.9)                                                                       | 7194 (9.6)                                                                                 | 3609 (10.2)                                                                          |
| Missing                                                                            | 128 (0.1)                                                                        | 120 (0.2)                                                                                  | 85 (0.2)                                                                             |
| Plurality                                                                          |                                                                                  |                                                                                            |                                                                                      |
| Singleton                                                                          | 89233 (97.3)                                                                     | 72517 (96.8)                                                                               | 34134 (96.4)                                                                         |
| Twins or others                                                                    | 2440 (2.7)                                                                       | 2386 (3.2)                                                                                 | 1285 (3.6)                                                                           |
| Apgar score (5 minutes)                                                            |                                                                                  |                                                                                            |                                                                                      |
| 5 min Apgar: < 7                                                                   | 1006 (1.1)                                                                       | 985 (1.3)                                                                                  | 681 (1.9)                                                                            |
| 5 min Apgar: 7-10                                                                  | 90450 (98.7)                                                                     | 73761 (98.5)                                                                               | 34653 (97.8)                                                                         |
| Missing                                                                            | 217 (0.2)                                                                        | 157 (0.2)                                                                                  | 85 (0.2)                                                                             |
| <b>Maternal and familial socioeconomic factors</b>                                 |                                                                                  |                                                                                            |                                                                                      |
| Maternal parity                                                                    |                                                                                  |                                                                                            |                                                                                      |
| First born child                                                                   | 36017 (39.3)                                                                     | 30868 (41.2)                                                                               | 14960 (42.2)                                                                         |
| Second born child                                                                  | 31884 (34.8)                                                                     | 24845 (33.2)                                                                               | 11721 (33.1)                                                                         |
| Third born child or younger                                                        | 23729 (25.9)                                                                     | 19134 (25.6)                                                                               | 8732 (24.7)                                                                          |
| Missing                                                                            | 43 (0.1)                                                                         | 56 (0.1)                                                                                   | 6 (0)                                                                                |
| Gestational weeks at 1 <sup>st</sup> antenatal visit                               |                                                                                  |                                                                                            |                                                                                      |
| Antenatal care < 20 weeks                                                          | 78729 (85.9)                                                                     | 64439 (86)                                                                                 | 30398 (85.8)                                                                         |
| Antenatal care $\geq$ 20 weeks                                                     | 12288 (13.4)                                                                     | 9819 (13.1)                                                                                | 4665 (13.2)                                                                          |
| Missing                                                                            | 656 (0.7)                                                                        | 645 (0.9)                                                                                  | 356 (1)                                                                              |
| Maternal smoking during pregnancy                                                  |                                                                                  |                                                                                            |                                                                                      |
| Yes                                                                                | 16161 (17.6)                                                                     | 16209 (21.6)                                                                               | 7713 (21.8)                                                                          |
| No                                                                                 | 75502 (82.4)                                                                     | 58683 (78.4)                                                                               | 27698 (78.2)                                                                         |
| Unknown                                                                            | 10 (0)                                                                           | 11 (0)                                                                                     | 8 (0)                                                                                |
| Maternal age at child's birth (years)                                              |                                                                                  |                                                                                            |                                                                                      |
| < 20                                                                               | 3952 (4.3)                                                                       | 4573 (6.1)                                                                                 | 2017 (5.7)                                                                           |
| 20-24                                                                              | 13753 (15)                                                                       | 13491 (18)                                                                                 | 6321 (17.9)                                                                          |
| 25-34                                                                              | 56024 (61.1)                                                                     | 44371 (59.2)                                                                               | 20961 (59.2)                                                                         |
| 35-39                                                                              | 14748 (16.1)                                                                     | 10279 (13.7)                                                                               | 5022 (14.2)                                                                          |
| $\geq$ 40                                                                          | 3164 (3.5)                                                                       | 2157 (2.9)                                                                                 | 1085 (3.1)                                                                           |
| Missing                                                                            | 32 (0)                                                                           | 32 (0)                                                                                     | 13 (0)                                                                               |
| Maternal postcode-level residential socioeconomic disadvantage (IRSD) <sup>a</sup> |                                                                                  |                                                                                            |                                                                                      |
| $\leq$ 25% (most disadvantaged)                                                    | 19958 (21.8)                                                                     | 17472 (23.3)                                                                               | 7776 (22)                                                                            |
| 25 <- 50%                                                                          | 22722 (24.8)                                                                     | 19806 (26.4)                                                                               | 8892 (25.1)                                                                          |
| 50 <- 75%                                                                          | 25066 (27.3)                                                                     | 19457 (26)                                                                                 | 9353 (26.4)                                                                          |
| > 75% (least disadvantaged)                                                        | 23879 (26.1)                                                                     | 18132 (24.2)                                                                               | 9388 (26.5)                                                                          |

|                                                                          |              |              |              |
|--------------------------------------------------------------------------|--------------|--------------|--------------|
| Missing                                                                  | 48 (0.1)     | 36 (0.1)     | 10 (0)       |
| <b>Maternal postcode-level residential remoteness (ARIA)<sup>b</sup></b> |              |              |              |
| Major Cities of Australia                                                | 71804 (78.3) | 55615 (74.3) | 27256 (77)   |
| Inner Regional Australia                                                 | 14886 (16.2) | 13857 (18.5) | 5952 (16.8)  |
| Outer Regional Australia                                                 | 4537 (5)     | 4777 (6.4)   | 1916 (5.4)   |
| Remote & Very Remote Australia                                           | 419 (0.5)    | 634 (0.9)    | 292 (0.8)    |
| Unknown                                                                  | 27 (0)       | 20 (0)       | --           |
| <b>Maternal country of birth</b>                                         |              |              |              |
| Australia born                                                           | 64393 (70.2) | 56853 (75.9) | 27080 (76.5) |
| Non-Australia born                                                       | 27280 (29.8) | 18050 (24.1) | 8339 (23.5)  |
| <b>Parental highest educational attainment<sup>c</sup></b>               |              |              |              |
| Year 12 or equivalent or below                                           | 19939 (21.8) | 18401 (24.6) | 8320 (23.5)  |
| Certificate or Diploma                                                   | 39702 (43.3) | 33282 (44.4) | 15670 (44.2) |
| Bachelor's degree or above                                               | 25593 (27.9) | 17914 (23.9) | 8933 (25.2)  |
| Missing                                                                  | 6439 (7)     | 5306 (7.1)   | 2496 (7.1)   |
| <b>Child's age at NAPLAN Grade 3 test</b>                                |              |              |              |
| 9 years                                                                  | 6470 (7.1)   | 4653 (6.2)   | 1828 (5.2)   |
| 10 years                                                                 | 75568 (82.4) | 60831 (81.2) | 28215 (79.7) |
| 11 years                                                                 | 9604 (10.5)  | 9386 (12.5)  | 5346 (15.1)  |
| Other                                                                    | 31 (0)       | 33 (0)       | 30 (0.1)     |
| <b>Child's year of birth</b>                                             |              |              |              |
| 2000                                                                     | 21394 (23.3) | 17792 (23.8) | 8036 (22.7)  |
| 2001                                                                     | 20572 (22.4) | 17669 (23.6) | 8322 (23.5)  |
| 2002                                                                     | 20973 (22.9) | 17159 (22.9) | 8409 (23.7)  |
| 2003                                                                     | 21695 (23.7) | 17211 (23)   | 8349 (23.6)  |
| 2004                                                                     | 7034 (7.7)   | 5068 (6.8)   | 2301 (6.5)   |
| 2005                                                                     | --           | --           | --           |
| 2006                                                                     | --           | --           | --           |

<sup>a</sup> Maternal postcode-level residential socioeconomic disadvantage was measured using the Index of Relative Socioeconomic Disadvantage (IRSD) score.

<sup>b</sup> Maternal postcode-level residential remoteness was determined using the Accessibility/Remoteness Index of Australia (ARIA) classification.

<sup>c</sup> Parental highest educational attainment was measured at the time of the child's NAPLAN Grade 5 test.

-- Numbers from 1 to 5 are suppressed from presentation to protect individual confidentiality.

Supplementary Table 4 Characteristics of children with a NAPLAN record at grade 7

| Factors                                                                            | Children without recorded hospitalisations prior to NAPLAN assessment at Grade 7 | Children hospitalised without any chronic conditions prior to NAPLAN assessment at Grade 7 | Children hospitalised with a chronic condition prior to NAPLAN assessment at Grade 7 |
|------------------------------------------------------------------------------------|----------------------------------------------------------------------------------|--------------------------------------------------------------------------------------------|--------------------------------------------------------------------------------------|
|                                                                                    | n (Column %)                                                                     | n (Column %)                                                                               | n (Column %)                                                                         |
| <b>All</b>                                                                         | 36320 (100)                                                                      | 33432 (100)                                                                                | 15555 (100)                                                                          |
| <b>Child's sex</b>                                                                 |                                                                                  |                                                                                            |                                                                                      |
| Male                                                                               | 15928 (43.9)                                                                     | 18123 (54.2)                                                                               | 9090 (58.4)                                                                          |
| Female                                                                             | 20383 (56.1)                                                                     | 15297 (45.8)                                                                               | 6457 (41.5)                                                                          |
| Unknown                                                                            | 9 (0)                                                                            | 12 (0)                                                                                     | 8 (0.1)                                                                              |
| <b>Child perinatal factors</b>                                                     |                                                                                  |                                                                                            |                                                                                      |
| Gestational age (weeks)                                                            |                                                                                  |                                                                                            |                                                                                      |
| Pre-term birth (gestational age $\leq$ 36)                                         | 1826 (5)                                                                         | 2387 (7.1)                                                                                 | 1521 (9.8)                                                                           |
| Term birth (gestational age: 37-41)                                                | 33395 (92)                                                                       | 30141 (90.2)                                                                               | 13645 (87.7)                                                                         |
| Post-term birth (gestational age $\geq$ 42)                                        | 1098 (3)                                                                         | 896 (2.7)                                                                                  | 388 (2.5)                                                                            |
| Missing                                                                            | --                                                                               | 8 (0)                                                                                      | --                                                                                   |
| Birthweight by gestation                                                           |                                                                                  |                                                                                            |                                                                                      |
| Small for gestation (<10%)                                                         | 4060 (11.2)                                                                      | 3962 (11.9)                                                                                | 2022 (13)                                                                            |
| Birthweight by gestation: 10-90%                                                   | 28653 (78.9)                                                                     | 26177 (78.3)                                                                               | 11941 (76.8)                                                                         |
| Large for gestation ( $\geq$ 90%)                                                  | 3572 (9.8)                                                                       | 3237 (9.7)                                                                                 | 1558 (10)                                                                            |
| Missing                                                                            | 35 (0.1)                                                                         | 56 (0.2)                                                                                   | 34 (0.2)                                                                             |
| Plurality                                                                          |                                                                                  |                                                                                            |                                                                                      |
| Singleton                                                                          | 35342 (97.3)                                                                     | 32364 (96.8)                                                                               | 15009 (96.5)                                                                         |
| Twins or others                                                                    | 978 (2.7)                                                                        | 1068 (3.2)                                                                                 | 546 (3.5)                                                                            |
| Apgar score (5 minutes)                                                            |                                                                                  |                                                                                            |                                                                                      |
| 5 min Apgar: < 7                                                                   | 411 (1.1)                                                                        | 474 (1.4)                                                                                  | 295 (1.9)                                                                            |
| 5 min Apgar: 7-10                                                                  | 35820 (98.6)                                                                     | 32878 (98.3)                                                                               | 15228 (97.9)                                                                         |
| Missing                                                                            | 89 (0.3)                                                                         | 80 (0.2)                                                                                   | 32 (0.2)                                                                             |
| <b>Maternal and familial socioeconomic factors</b>                                 |                                                                                  |                                                                                            |                                                                                      |
| Maternal parity                                                                    |                                                                                  |                                                                                            |                                                                                      |
| First born child                                                                   | 13728 (37.8)                                                                     | 13137 (39.3)                                                                               | 6291 (40.4)                                                                          |
| Second born child                                                                  | 12560 (34.6)                                                                     | 11086 (33.2)                                                                               | 5040 (32.4)                                                                          |
| Third born child or younger                                                        | 10018 (27.6)                                                                     | 9188 (27.5)                                                                                | 4221 (27.1)                                                                          |
| Missing                                                                            | 14 (0)                                                                           | 21 (0.1)                                                                                   | --                                                                                   |
| Gestational weeks at 1 <sup>st</sup> antenatal visit                               |                                                                                  |                                                                                            |                                                                                      |
| Antenatal care < 20 weeks                                                          | 30877 (85)                                                                       | 28349 (84.8)                                                                               | 13091 (84.2)                                                                         |
| Antenatal care $\geq$ 20 weeks                                                     | 5140 (14.2)                                                                      | 4732 (14.2)                                                                                | 2282 (14.7)                                                                          |
| Missing                                                                            | 303 (0.8)                                                                        | 351 (1.1)                                                                                  | 182 (1.2)                                                                            |
| Maternal smoking during pregnancy                                                  |                                                                                  |                                                                                            |                                                                                      |
| Yes                                                                                | 7297 (20.1)                                                                      | 8371 (25)                                                                                  | 4028 (25.9)                                                                          |
| No                                                                                 | 29019 (79.9)                                                                     | 25055 (74.9)                                                                               | 11522 (74.1)                                                                         |
| Unknown                                                                            | --                                                                               | 6 (0)                                                                                      | --                                                                                   |
| Maternal age at child's birth (years)                                              |                                                                                  |                                                                                            |                                                                                      |
| < 20                                                                               | 1730 (4.8)                                                                       | 2313 (6.9)                                                                                 | 1065 (6.9)                                                                           |
| 20-24                                                                              | 5856 (16.1)                                                                      | 6569 (19.7)                                                                                | 3089 (19.9)                                                                          |
| 25-34                                                                              | 21909 (60.3)                                                                     | 19364 (57.9)                                                                               | 9046 (58.2)                                                                          |
| 35-39                                                                              | 5617 (15.5)                                                                      | 4272 (12.8)                                                                                | 1937 (12.5)                                                                          |
| $\geq$ 40                                                                          | 1195 (3.3)                                                                       | 897 (2.7)                                                                                  | 411 (2.6)                                                                            |
| Missing                                                                            | 13 (0)                                                                           | 17 (0.1)                                                                                   | 7 (0.1)                                                                              |
| Maternal postcode-level residential socioeconomic disadvantage (IRSD) <sup>a</sup> |                                                                                  |                                                                                            |                                                                                      |
| $\leq$ 25% (most disadvantaged)                                                    | 8907 (24.5)                                                                      | 8708 (26.1)                                                                                | 3851 (24.8)                                                                          |
| 25 <- 50%                                                                          | 9313 (25.6)                                                                      | 9375 (28)                                                                                  | 4233 (27.2)                                                                          |
| 50 <- 75%                                                                          | 10062 (27.7)                                                                     | 8664 (25.9)                                                                                | 4116 (26.5)                                                                          |
| > 75% (least disadvantaged)                                                        | 8019 (22.1)                                                                      | 6674 (20)                                                                                  | 3350 (21.5)                                                                          |

|                                                                          |              |              |              |
|--------------------------------------------------------------------------|--------------|--------------|--------------|
| Missing                                                                  | 19 (0.1)     | 11 (0)       | --           |
| <b>Maternal postcode-level residential remoteness (ARIA)<sup>b</sup></b> |              |              |              |
| Major Cities of Australia                                                | 28438 (78.3) | 24357 (72.9) | 11713 (75.3) |
| Inner Regional Australia                                                 | 5874 (16.2)  | 6521 (19.5)  | 2739 (17.6)  |
| Outer Regional Australia                                                 | 1838 (5.1)   | 2238 (6.7)   | 946 (6.1)    |
| Remote & Very Remote Australia                                           | 161 (0.4)    | 310 (0.9)    | 154 (1)      |
| Unknown                                                                  | 9 (0)        | 6 (0)        | --           |
| <b>Maternal country of birth</b>                                         |              |              |              |
| Australia born                                                           | 24948 (68.7) | 25178 (75.3) | 11765 (75.6) |
| Non-Australia born                                                       | 11372 (31.3) | 8254 (24.7)  | 3790 (24.4)  |
| <b>Parental highest educational attainment<sup>c</sup></b>               |              |              |              |
| Year 12 or equivalent or below                                           | 8456 (23.3)  | 8726 (26.1)  | 3996 (25.7)  |
| Certificate or Diploma                                                   | 17459 (48.1) | 16636 (49.8) | 7698 (49.5)  |
| Bachelor's degree or above                                               | 9390 (25.9)  | 7115 (21.3)  | 3410 (21.9)  |
| Missing                                                                  | 1015 (2.8)   | 955 (2.9)    | 451 (2.9)    |
| <b>Child's age at NAPLAN Grade 3 test</b>                                |              |              |              |
| 11 years                                                                 | 6470 (7.1)   | 4653 (6.2)   | 1828 (5.2)   |
| 12 years                                                                 | 75568 (82.4) | 60831 (81.2) | 28215 (79.7) |
| 13 years                                                                 | 9604 (10.5)  | 9386 (12.5)  | 5346 (15.1)  |
| Other                                                                    | 31 (0)       | 33 (0)       | 30 (0.1)     |
| <b>Child's year of birth</b>                                             |              |              |              |
| 2000                                                                     | 16040 (44.2) | 14755 (44.1) | 6857 (44.1)  |
| 2001                                                                     | 15255 (42)   | 14387 (43)   | 6770 (43.5)  |
| 2002                                                                     | 5024 (13.8)  | 4285 (12.8)  | 1927 (12.4)  |
| 2003                                                                     | 0 (0)        | --           | --           |
| 2004                                                                     | 0 (0)        | 0 (0)        | 0 (0)        |
| 2005                                                                     | --           | 0 (0)        | 0 (0)        |
| 2006                                                                     | 0 (0)        | --           | 0 (0)        |

<sup>a</sup> Maternal postcode-level residential socioeconomic disadvantage was measured using the Index of Relative Socioeconomic Disadvantage (IRSD) score.

<sup>b</sup> Maternal postcode-level residential remoteness was determined using the Accessibility/Remoteness Index of Australia (ARIA) classification.

<sup>c</sup> Parental highest educational attainment was measured at the time of the child's NAPLAN Grade 7 test.

-- Numbers from 1 to 5 are suppressed from presentation to protect individual confidentiality.



**Supplementary Table 5** Most frequently reported health conditions among children hospitalised without any chronic conditions

| <b>ICD-10-AM code</b> | <b>ICD-10-AM condition</b>                                             |
|-----------------------|------------------------------------------------------------------------|
| <b>K02</b>            | Dental caries                                                          |
| <b>J21</b>            | Acute bronchiolitis                                                    |
| <b>J35</b>            | Chronic diseases of tonsils and adenoids                               |
| <b>A08</b>            | Viral and other specified intestinal infections                        |
| <b>B34</b>            | Viral infection of unspecified site                                    |
| <b>A09</b>            | Other gastroenteritis and colitis of infectious and unspecified origin |
| <b>S52</b>            | Fracture of forearm                                                    |
| <b>J06</b>            | Acute upper respiratory infections of multiple and unspecified sites   |
| <b>J05</b>            | Acute obstructive laryngitis [croup] and epiglottitis                  |
| <b>J18</b>            | Pneumonia, organism unspecified                                        |
| <b>R68</b>            | Other general symptoms and signs                                       |
| <b>Z41</b>            | Procedures for purposes other than remedying health state              |
| <b>S01</b>            | Superficial injury of neck                                             |
| <b>R56</b>            | Convulsions, not elsewhere classified                                  |
| <b>R50</b>            | Fever of other and unknown origin                                      |
| <b>K40</b>            | Inguinal hernia                                                        |
| <b>H66</b>            | Suppurative and unspecified otitis media                               |
| <b>J03</b>            | Acute tonsillitis                                                      |
| <b>S42</b>            | Fracture of shoulder and upper arm                                     |
| <b>N39</b>            | Other disorders of urinary system                                      |

**Supplementary Table 6** Proportion of children missing a NAPLAN test due to any reason

|                                                                                   | Missing a NAPLAN test due to any reason |                          |                |                          |                |                          |
|-----------------------------------------------------------------------------------|-----------------------------------------|--------------------------|----------------|--------------------------|----------------|--------------------------|
|                                                                                   | Grade 3 cohort                          |                          | Grade 5 cohort |                          | Grade 7 cohort |                          |
|                                                                                   | Total N                                 | n (% of missing testing) | Total N        | n (% of missing testing) | Total N        | n (% of missing testing) |
| <b>Children without recorded hospitalisations prior to testing</b>                | 147456                                  | 5882 (3.99)              | 91673          | 3241 (3.54)              | 36320          | 1974 (5.44)              |
| <b>Children hospitalised without any chronic conditions (CC) prior to testing</b> | 105033                                  | 5367 (5.11)              | 74903          | 3676 (4.91)              | 33432          | 2493 (7.46)              |
| <b>Children hospitalised with a CC prior to testing</b>                           | 50091                                   | 4926 (9.83)              | 35419          | 3279 (9.26)              | 15555          | 1931 (12.41)             |
| <b>Frequency of hospitalisations with a CC</b>                                    |                                         |                          |                |                          |                |                          |
| 1                                                                                 | 31398                                   | 2167 (6.90)              | 22093          | 1399 (6.33)              | 9664           | 928 (9.60)               |
| 2-3                                                                               | 13084                                   | 1338 (10.23)             | 9223           | 885 (9.60)               | 4010           | 489 (12.19)              |
| 4-6                                                                               | 3326                                    | 580 (17.44)              | 2452           | 421 (17.17)              | 1114           | 234 (21.01)              |
| ≥ 7                                                                               | 2283                                    | 841 (36.84)              | 1651           | 574 (34.77)              | 767            | 280 (36.51)              |
| <b>Duration of hospitalisations with a CC (bed-days)</b>                          |                                         |                          |                |                          |                |                          |
| 1-2                                                                               | 30505                                   | 2146 (7.03)              | 21179          | 1426 (6.73)              | 8958           | 868 (9.69)               |
| 3-4                                                                               | 7852                                    | 734 (9.35)               | 5542           | 455 (8.21)               | 2489           | 273 (10.97)              |
| 5-7                                                                               | 5048                                    | 526 (10.42)              | 3701           | 363 (9.81)               | 1672           | 225 (13.46)              |
| 8-14                                                                              | 3466                                    | 500 (14.43)              | 2633           | 375 (14.24)              | 1272           | 214 (16.82)              |
| ≥ 15                                                                              | 3220                                    | 1020 (31.68)             | 2364           | 660 (27.92)              | 1164           | 351 (30.15)              |

<sup>a</sup>Total N represents the total number of children for each category of hospitalisation.

<sup>b</sup>n (%) represents the number (proportion) of children missing a NAPLAN test due to any reason.

**Supplementary Table 7** Frequency and duration of hospitalisations for any health conditions among children with and without a chronic condition (CC)

|                                                                                                 | Grade 3 cohort                   |                               | Grade 5 cohort                   |                               | Grade 7 cohort                   |                               |
|-------------------------------------------------------------------------------------------------|----------------------------------|-------------------------------|----------------------------------|-------------------------------|----------------------------------|-------------------------------|
|                                                                                                 | Children hospitalised without CC | Children hospitalised with CC | Children hospitalised without CC | Children hospitalised with CC | Children hospitalised without CC | Children hospitalised with CC |
|                                                                                                 | N <sup>a</sup> (Column %)        | N (Column %)                  | N (Column %)                     | N (Column %)                  | N (Column %)                     | N (Column %)                  |
| <b>Total</b>                                                                                    | 105033 (100)                     | 50091 (100)                   | 74903 (100)                      | 35419 (100)                   | 33432 (100)                      | 15555 (100)                   |
| <b>Total frequency of hospitalisations for any health conditions prior to testing</b>           |                                  |                               |                                  |                               |                                  |                               |
| 1                                                                                               | 65575 (62.43)                    | 12721 (25.4)                  | 44879 (59.92)                    | 8268 (23.34)                  | 19309 (57.76)                    | 3339 (21.47)                  |
| 2-3                                                                                             | 33954 (32.33)                    | 21432 (42.79)                 | 25400 (33.91)                    | 15010 (42.38)                 | 11789 (35.26)                    | 6485 (41.69)                  |
| 4-6                                                                                             | 5112 (4.87)                      | 10864 (21.69)                 | 4250 (5.67)                      | 8179 (23.09)                  | 2118 (6.34)                      | 3787 (24.35)                  |
| ≥ 7                                                                                             | 392 (0.37)                       | 5074 (10.13)                  | 374 (0.5)                        | 3962 (11.19)                  | 216 (0.65)                       | 1944 (12.5)                   |
| <b>Total duration of hospitalisations for any health conditions (bed-days) prior to testing</b> |                                  |                               |                                  |                               |                                  |                               |
| 1-2                                                                                             | 68032 (64.77)                    | 17071 (34.08)                 | 47547 (63.48)                    | 11163 (31.52)                 | 20823 (62.28)                    | 4431 (28.49)                  |
| 3-4                                                                                             | 20231 (19.26)                    | 10851 (21.66)                 | 14829 (19.80)                    | 7678 (21.68)                  | 6840 (20.46)                     | 3330 (21.41)                  |
| 5-7                                                                                             | 11342 (10.80)                    | 9224 (18.41)                  | 8395 (11.21)                     | 6750 (19.06)                  | 3757 (11.24)                     | 3088 (19.85)                  |
| 8-14                                                                                            | 4503 (4.29)                      | 7644 (15.26)                  | 3410 (4.55)                      | 5822 (16.44)                  | 1639 (4.9)                       | 2694 (17.32)                  |
| ≥ 15                                                                                            | 925 (0.88)                       | 5301 (10.58)                  | 722 (0.96)                       | 4006 (11.31)                  | 373 (1.12)                       | 2012 (12.93)                  |

<sup>a</sup> N represents the number of children included in each grade cohort who were or were not hospitalised with a chronic condition.

**Supplementary Table 8** Adjusted odds ratios (aOR) of children performing BNMS across NAPLAN domains at Grade 3, 5, and 7 for children hospitalised with a chronic condition prior to the test

|                                                                                         | Grade 3 cohort                       |                                  | Grade 5 cohort          |                     | Grade 7 cohort          |                     |
|-----------------------------------------------------------------------------------------|--------------------------------------|----------------------------------|-------------------------|---------------------|-------------------------|---------------------|
|                                                                                         | N. (%) of children BNMS <sup>a</sup> | Adjusted OR (95%CI) <sup>b</sup> | N. (%) of children BNMS | Adjusted OR (95%CI) | N. (%) of children BNMS | Adjusted OR (95%CI) |
| <b>NAPLAN Reading</b>                                                                   |                                      |                                  |                         |                     |                         |                     |
| Children hospitalised without any chronic conditions (CC) prior to testing (comparison) | 4999 (4.95)                          | Reference                        | 5366 (7.42)             | Reference           | 2013 (6.33)             | Reference           |
| Children hospitalised with a CC prior to testing                                        | 2588 (5.64)                          | 1.18 (1.13, 1.25)                | 2783 (8.51)             | 1.18 (1.12, 1.23)   | 1105 (7.85)             | 1.22 (1.13, 1.32)   |
| <b>NAPLAN Writing</b>                                                                   |                                      |                                  |                         |                     |                         |                     |
| Children hospitalised without CC prior to testing (comparison)                          | 3448 (3.41)                          | Reference                        | 5759 (7.97)             | Reference           | 4089 (12.85)            | Reference           |
| Children hospitalised with a CC prior to testing                                        | 1911 (4.17)                          | 1.24 (1.16, 1.31)                | 3237 (9.91)             | 1.25 (1.20, 1.31)   | 2268 (16.07)            | 1.24 (1.17, 1.31)   |
| <b>NAPLAN Spelling</b>                                                                  |                                      |                                  |                         |                     |                         |                     |
| Children hospitalised without CC prior to testing (comparison)                          | 5158 (5.10)                          | Reference                        | 4632 (6.40)             | Reference           | 2438 (7.65)             | Reference           |
| Children hospitalised with a CC prior to testing                                        | 2702 (5.88)                          | 1.19 (1.13, 1.25)                | 2451 (7.48)             | 1.17 (1.11, 1.23)   | 1317 (9.30)             | 1.19 (1.11, 1.28)   |
| <b>NAPLAN Grammar &amp; punctuation</b>                                                 |                                      |                                  |                         |                     |                         |                     |
| Children hospitalised without CC prior to testing (comparison)                          | 6713 (6.63)                          | Reference                        | 5913 (8.17)             | Reference           | 3530 (11.07)            | Reference           |
| Children hospitalised with a CC prior to testing                                        | 3310 (7.20)                          | 1.13 (1.08, 1.18)                | 3180 (9.71)             | 1.21 (1.16, 1.27)   | 1908 (13.47)            | 1.21 (1.14, 1.28)   |
| <b>NAPLAN Numeracy</b>                                                                  |                                      |                                  |                         |                     |                         |                     |
| Children hospitalised without CC prior to testing (comparison)                          | 4864 (4.83)                          | Reference                        | 4568 (6.35)             | Reference           | 1422 (4.51)             | Reference           |
| Children hospitalised with a CC prior to testing                                        | 2619 (5.73)                          | 1.24 (1.18, 1.31)                | 2507 (7.70)             | 1.26 (1.19, 1.33)   | 802 (5.75)              | 1.25 (1.14, 1.37)   |

<sup>a</sup> The denominators used to calculate the percentages (%) were the number of children who sat in the NAPLAN test (i.e., excluding children who were absent, exempt, or withdrawn from the test).

<sup>b</sup> The adjusted odds ratios (aORs) were derived from the multivariable logistic regression analyses controlling for school-level clustering effect and *all* the groups of confounders including child's sex, child's perinatal factors (gestational age, birthweight by gestation, plurality, Apgar score), maternal and familial socioeconomic factors (maternal parity, gestation of first antenatal care, maternal smoking, maternal age at child's birth, maternal country of birth, Aboriginality, maternal postcode-level residential socioeconomic status and remoteness at child's birth, and parental highest educational attainment), child's age at the NAPLAN test, child's year of birth, as well as the total length of duration of hospitalisations (due to any health conditions).

**Supplementary Table 9** Adjusted odds ratios (aOR) of children performing BNMS in reading in a NAPLAN test at Grade 3, 5, and 7 for children hospitalised with and without a chronic condition prior to the test

|                                                                                       | <b>Below the National Minimum Standard (BNMS) in NAPLAN reading</b> |                                  |                         |                     |                         |                     |
|---------------------------------------------------------------------------------------|---------------------------------------------------------------------|----------------------------------|-------------------------|---------------------|-------------------------|---------------------|
|                                                                                       | <b>Grade 3 cohort</b>                                               |                                  | <b>Grade 5 cohort</b>   |                     | <b>Grade 7 cohort</b>   |                     |
|                                                                                       | N. (%) of children BNMS <sup>a</sup>                                | Adjusted OR (95%CI) <sup>b</sup> | N. (%) of children BNMS | Adjusted OR (95%CI) | N. (%) of children BNMS | Adjusted OR (95%CI) |
| <b>Children without recorded hospitalisations prior to testing (comparison group)</b> | 5319 (3.71)                                                         | Reference                        | 4955 (5.54)             | Reference           | 1520 (4.33)             | Reference           |
| <b>Children hospitalised without any chronic conditions (CC) prior to testing</b>     | 4999 (4.95)                                                         | 1.13 (1.08, 1.19)                | 5366 (7.42)             | 1.15 (1.09, 1.21)   | 2013 (6.33)             | 1.19 (1.10, 1.29)   |
| <b>Children hospitalised with a CC prior to testing</b>                               | 2588 (5.64)                                                         | 1.35 (1.28, 1.42)                | 2783 (8.51)             | 1.35 (1.28, 1.42)   | 1105 (7.85)             | 1.49 (1.38, 1.61)   |
| <b>Total frequency of hospitalisations with a CC prior to testing</b>                 |                                                                     |                                  |                         |                     |                         |                     |
| 1                                                                                     | 1555 (5.24)                                                         | 1.25 (1.18, 1.33)                | 1652 (7.86)             | 1.25 (1.17, 1.33)   | 650 (7.23)              | 1.37 (1.25, 1.51)   |
| 2-3                                                                                   | 704 (5.90)                                                          | 1.43 (1.31, 1.55)                | 759 (8.93)              | 1.46 (1.34, 1.59)   | 311 (8.53)              | 1.62 (1.42, 1.85)   |
| 4-6                                                                                   | 198 (7.07)                                                          | 1.69 (1.45, 1.97)                | 217 (10.42)             | 1.59 (1.36, 1.86)   | 86 (9.39)               | 1.75 (1.40, 2.18)   |
| ≥ 7                                                                                   | 131 (8.72)                                                          | 1.97 (1.61, 2.42)                | 155 (13.83)             | 2.12 (1.75, 2.57)   | 58 (11.18)              | 2.10 (1.54, 2.85)   |
| <b>Total duration of hospitalisations with a CC (bed-days) prior to testing</b>       |                                                                     |                                  |                         |                     |                         |                     |
| 1-2                                                                                   | 1463 (5.09)                                                         | 1.28 (1.20, 1.35)                | 1536 (7.66)             | 1.29 (1.21, 1.37)   | 578 (6.95)              | 1.38 (1.25, 1.52)   |
| 3-4                                                                                   | 428 (5.91)                                                          | 1.38 (1.24, 1.54)                | 420 (8.13)              | 1.25 (1.12, 1.39)   | 181 (7.89)              | 1.44 (1.22, 1.71)   |
| 5-7                                                                                   | 277 (6.01)                                                          | 1.34 (1.18, 1.52)                | 312 (9.17)              | 1.39 (1.23, 1.57)   | 116 (7.76)              | 1.39 (1.14, 1.69)   |
| 8-14                                                                                  | 230 (7.60)                                                          | 1.66 (1.44, 1.91)                | 246 (10.63)             | 1.54 (1.33, 1.78)   | 121 (11.06)             | 1.98 (1.60, 2.44)   |
| ≥ 15                                                                                  | 190 (8.34)                                                          | 1.63 (1.38, 1.93)                | 269 (15.23)             | 1.97 (1.69, 2.30)   | 109 (12.49)             | 2.17 (1.73, 2.71)   |

<sup>a</sup> The denominators used to calculate the percentages (%) were the number of children who sat in the NAPLAN test (i.e., excluding children who were absent, exempt, or withdrawn from the test).

<sup>b</sup> The adjusted odds ratios (aOR) were derived from the multivariable logistic regression analyses controlling for school-level clustering effect and *all* groups of confounders including child's sex, child's perinatal factors (gestational age, birthweight by gestation, plurality, Apgar score), maternal and familial socioeconomic factors (maternal parity, gestation of first antenatal care, maternal smoking, maternal age at child's birth, maternal country of birth, Aboriginality, maternal postcode-level residential socioeconomic status and remoteness at child's birth, and parental highest educational attainment), child's age at the NAPLAN test, and child's year of birth.

**Supplementary Table 10** Adjusted odds ratios (aOR) of children performing BNMS in writing in a NAPLAN test at Grade 3, 5, and 7 for children hospitalised with and without a chronic condition prior to the test

|                                                                                       | <b>Below the National Minimum Standard (BNMS) in NAPLAN writing</b> |                                  |                         |                     |                         |                     |
|---------------------------------------------------------------------------------------|---------------------------------------------------------------------|----------------------------------|-------------------------|---------------------|-------------------------|---------------------|
|                                                                                       | <b>Grade 3 cohort</b>                                               |                                  | <b>Grade 5 cohort</b>   |                     | <b>Grade 7 cohort</b>   |                     |
|                                                                                       | N. (%) of children BNMS <sup>a</sup>                                | Adjusted OR (95%CI) <sup>b</sup> | N. (%) of children BNMS | Adjusted OR (95%CI) | N. (%) of children BNMS | Adjusted OR (95%CI) |
| <b>Children without recorded hospitalisations prior to testing (comparison group)</b> | 3387 (2.37)                                                         | Reference                        | 4915 (5.50)             | Reference           | 3125 (8.9)              | Reference           |
| <b>Children hospitalised without any chronic conditions (CC) prior to testing</b>     | 3448 (3.41)                                                         | 1.11 (1.04, 1.17)                | 5759 (7.97)             | 1.18 (1.12, 1.24)   | 4089 (12.85)            | 1.14 (1.08, 1.21)   |
| <b>Children hospitalised with a CC prior to testing</b>                               | 1911 (4.17)                                                         | 1.43 (1.34, 1.52)                | 3237 (9.91)             | 1.47 (1.40, 1.54)   | 2268 (16.07)            | 1.44 (1.36, 1.54)   |
| <b>Total frequency of hospitalisations with a CC prior to testing</b>                 |                                                                     |                                  |                         |                     |                         |                     |
| 1                                                                                     | 1132 (3.82)                                                         | 1.32 (1.23, 1.42)                | 1925 (9.17)             | 1.35 (1.28, 1.43)   | 1375 (15.23)            | 1.37 (1.28, 1.47)   |
| 2-3                                                                                   | 501 (4.20)                                                          | 1.43 (1.30, 1.58)                | 851 (10.04)             | 1.51 (1.40, 1.63)   | 583 (15.97)             | 1.43 (1.29, 1.58)   |
| 4-6                                                                                   | 156 (5.56)                                                          | 1.84 (1.55, 2.19)                | 249 (12.00)             | 1.69 (1.47, 1.95)   | 183 (19.85)             | 1.82 (1.54, 2.15)   |
| ≥ 7                                                                                   | 122 (8.18)                                                          | 2.77 (2.24, 3.42)                | 212 (19.05)             | 3.02 (2.53, 3.60)   | 127 (24.71)             | 2.40 (1.93, 2.99)   |
| <b>Total duration of hospitalisations with a CC (bed-days) prior to testing</b>       |                                                                     |                                  |                         |                     |                         |                     |
| 1-2                                                                                   | 1054 (3.67)                                                         | 1.33 (1.24, 1.43)                | 1738 (8.67)             | 1.34 (1.26, 1.42)   | 1244 (14.88)            | 1.38 (1.28, 1.48)   |
| 3-4                                                                                   | 297 (4.10)                                                          | 1.36 (1.20, 1.55)                | 508 (9.84)              | 1.43 (1.29, 1.58)   | 347 (15.14)             | 1.30 (1.14, 1.48)   |
| 5-7                                                                                   | 213 (4.62)                                                          | 1.46 (1.26, 1.69)                | 369 (10.86)             | 1.54 (1.37, 1.73)   | 245 (16.31)             | 1.44 (1.24, 1.68)   |
| 8-14                                                                                  | 170 (5.61)                                                          | 1.74 (1.47, 2.06)                | 284 (12.34)             | 1.70 (1.48, 1.96)   | 210 (19.13)             | 1.60 (1.35, 1.88)   |
| ≥ 15                                                                                  | 177 (7.80)                                                          | 2.19 (1.84, 2.62)                | 338 (19.24)             | 2.55 (2.22, 2.94)   | 222 (25.66)             | 2.40 (2.04, 2.82)   |

<sup>a</sup> The denominators used to calculate the percentages (%) were the number of children who sat in the NAPLAN test (i.e., excluding children who were absent, exempt, or withdrawn from the test).

<sup>b</sup> The adjusted odds ratios (aORs) were derived from the multivariable logistic regression analyses controlling for school-level clustering effect and *all* the groups of confounders including child's sex, child's perinatal factors (gestational age, birthweight by gestation, plurality, Apgar score), maternal and familial socioeconomic factors (maternal parity, gestation of first antenatal care, maternal smoking, maternal age at child's birth, maternal country of birth, Aboriginality, maternal postcode-level residential socioeconomic status and remoteness at child's birth, and parental highest educational attainment), child's age at the NAPLAN test, and child's year of birth.

**Supplementary Table 11** Adjusted odds ratios (aOR) of children performing BNMS in spelling in a NAPLAN test at Grade 3, 5, and 7 for children hospitalised with and without a chronic condition prior to the test

|                                                                                       | <b>Below the National Minimum Standard (BNMS) in NAPLAN spelling</b> |                                  |                         |                     |                         |                     |
|---------------------------------------------------------------------------------------|----------------------------------------------------------------------|----------------------------------|-------------------------|---------------------|-------------------------|---------------------|
|                                                                                       | <b>Grade 3 cohort</b>                                                |                                  | <b>Grade 5 cohort</b>   |                     | <b>Grade 7 cohort</b>   |                     |
|                                                                                       | N. (%) of children BNMS <sup>a</sup>                                 | Adjusted OR (95%CI) <sup>b</sup> | N. (%) of children BNMS | Adjusted OR (95%CI) | N. (%) of children BNMS | Adjusted OR (95%CI) |
| <b>Children without recorded hospitalisations prior to testing (comparison group)</b> | 5080 (3.54)                                                          | Reference                        | 3883 (4.34)             | Reference           | 1802 (5.13)             | Reference           |
| <b>Children hospitalised without any chronic conditions (CC) prior to testing</b>     | 5158 (5.10)                                                          | 1.17 (1.11, 1.22)                | 4632 (6.40)             | 1.24 (1.18, 1.31)   | 2438 (7.65)             | 1.21 (1.12, 1.30)   |
| <b>Children hospitalised with a CC prior to testing</b>                               | 2702 (5.88)                                                          | 1.40 (1.34, 1.47)                | 2451 (7.48)             | 1.42 (1.35, 1.50)   | 1317 (9.30)             | 1.46 (1.35, 1.57)   |
| <b>Total frequency of hospitalisations with a CC prior to testing</b>                 |                                                                      |                                  |                         |                     |                         |                     |
| 1                                                                                     | 1593 (5.36)                                                          | 1.28 (1.21, 1.36)                | 1457 (6.92)             | 1.32 (1.24, 1.40)   | 781 (8.63)              | 1.36 (1.24, 1.49)   |
| 2-3                                                                                   | 720 (6.02)                                                           | 1.45 (1.34, 1.58)                | 650 (7.64)              | 1.47 (1.35, 1.61)   | 350 (9.56)              | 1.51 (1.32, 1.72)   |
| 4-6                                                                                   | 218 (7.75)                                                           | 1.79 (1.55, 2.07)                | 198 (9.49)              | 1.71 (1.45, 2.02)   | 109 (11.76)             | 1.78 (1.44, 2.20)   |
| ≥ 7                                                                                   | 171 (11.35)                                                          | 2.73 (2.30, 3.25)                | 146 (13.01)             | 2.40 (1.98, 2.92)   | 77 (14.69)              | 2.27 (1.72, 2.99)   |
| <b>Total duration of hospitalisations with a CC (bed-days) prior to testing</b>       |                                                                      |                                  |                         |                     |                         |                     |
| 1-2                                                                                   | 1499 (5.21)                                                          | 1.32 (1.24, 1.40)                | 1341 (6.68)             | 1.34 (1.25, 1.42)   | 712 (8.49)              | 1.37 (1.25, 1.50)   |
| 3-4                                                                                   | 395 (5.45)                                                           | 1.24 (1.12, 1.39)                | 373 (7.19)              | 1.33 (1.19, 1.48)   | 218 (9.49)              | 1.49 (1.27, 1.74)   |
| 5-7                                                                                   | 311 (6.73)                                                           | 1.48 (1.31, 1.67)                | 259 (7.59)              | 1.35 (1.18, 1.54)   | 133 (8.81)              | 1.33 (1.11, 1.60)   |
| 8-14                                                                                  | 249 (8.20)                                                           | 1.80 (1.56, 2.08)                | 228 (9.86)              | 1.75 (1.51, 2.03)   | 118 (10.74)             | 1.56 (1.26, 1.92)   |
| ≥ 15                                                                                  | 248 (10.85)                                                          | 2.12 (1.83, 2.46)                | 250 (14.16)             | 2.24 (1.92, 2.61)   | 136 (15.47)             | 2.25 (1.81, 2.79)   |

<sup>a</sup> The denominators used to calculate the percentages (%) were the number of children who sat in the NAPLAN test (i.e., excluding children who were absent, exempt, or withdrawn from the test).

<sup>b</sup> The adjusted odds ratios (aORs) were derived from the multivariable logistic regression analyses controlling for school-level clustering effect and *all* the groups of confounders including child's sex, child's perinatal factors (gestational age, birthweight by gestation, plurality, Apgar score), maternal and familial socioeconomic factors (maternal parity, gestation of first antenatal care, maternal smoking, maternal age at child's birth, maternal country of birth, Aboriginality, maternal postcode-level residential socioeconomic status and remoteness at child's birth, and parental highest educational attainment), child's age at the NAPLAN test, and child's year of birth.

**Supplementary Table 12** Adjusted odds ratios (aOR) of children performing BNMS in grammar & punctuation in a NAPLAN test at Grade 3, 5, and 7 for children hospitalised with and without a chronic condition prior to the test

|                                                                                       | Below the National Minimum Standard (BNMS) in NAPLAN grammar & punctuation |                                  |                         |                     |                         |                     |
|---------------------------------------------------------------------------------------|----------------------------------------------------------------------------|----------------------------------|-------------------------|---------------------|-------------------------|---------------------|
|                                                                                       | Grade 3 cohort                                                             |                                  | Grade 5 cohort          |                     | Grade 7 cohort          |                     |
|                                                                                       | N. (%) of children BNMS <sup>a</sup>                                       | Adjusted OR (95%CI) <sup>b</sup> | N. (%) of children BNMS | Adjusted OR (95%CI) | N. (%) of children BNMS | Adjusted OR (95%CI) |
| <b>Children without recorded hospitalisations prior to testing (comparison group)</b> | 6829 (4.76)                                                                | Reference                        | 5147 (5.75)             | Reference           | 2735 (7.78)             | Reference           |
| <b>Children hospitalised without any chronic conditions (CC) prior to testing</b>     | 6713 (6.63)                                                                | 1.16 (1.11, 1.21)                | 5913 (8.17)             | 1.22 (1.16, 1.28)   | 3530 (11.07)            | 1.21 (1.14, 1.28)   |
| <b>Children hospitalised with a CC prior to testing</b>                               | 3310 (7.20)                                                                | 1.32 (1.26, 1.38)                | 3180 (9.71)             | 1.45 (1.38, 1.53)   | 1908 (13.47)            | 1.47 (1.38, 1.56)   |
| <b>Total frequency of hospitalisations with a CC prior to testing</b>                 |                                                                            |                                  |                         |                     |                         |                     |
| 1                                                                                     | 2033 (6.84)                                                                | 1.26 (1.19, 1.32)                | 1944 (9.24)             | 1.38 (1.30, 1.47)   | 1135 (12.53)            | 1.36 (1.27, 1.47)   |
| 2-3                                                                                   | 847 (7.08)                                                                 | 1.32 (1.22, 1.42)                | 827 (9.72)              | 1.49 (1.37, 1.61)   | 526 (14.37)             | 1.58 (1.42, 1.76)   |
| 4-6                                                                                   | 275 (9.78)                                                                 | 1.76 (1.54, 2.01)                | 240 (11.50)             | 1.63 (1.40, 1.91)   | 150 (16.18)             | 1.76 (1.49, 2.07)   |
| ≥ 7                                                                                   | 155 (10.29)                                                                | 1.82 (1.52, 2.18)                | 169 (15.06)             | 2.17 (1.81, 2.62)   | 97 (18.51)              | 1.99 (1.55, 2.55)   |
| <b>Total duration of hospitalisations with a CC (bed-days) prior to testing</b>       |                                                                            |                                  |                         |                     |                         |                     |
| 1-2                                                                                   | 1877 (6.52)                                                                | 1.26 (1.20, 1.33)                | 1746 (8.69)             | 1.38 (1.29, 1.46)   | 1030 (12.29)            | 1.38 (1.28, 1.49)   |
| 3-4                                                                                   | 507 (6.99)                                                                 | 1.24 (1.13, 1.37)                | 516 (9.95)              | 1.46 (1.32, 1.62)   | 315 (13.72)             | 1.46 (1.29, 1.65)   |
| 5-7                                                                                   | 371 (8.03)                                                                 | 1.37 (1.22, 1.54)                | 358 (10.50)             | 1.49 (1.32, 1.69)   | 197 (13.06)             | 1.38 (1.18, 1.62)   |
| 8-14                                                                                  | 299 (9.85)                                                                 | 1.65 (1.47, 1.87)                | 262 (11.33)             | 1.50 (1.31, 1.72)   | 192 (17.47)             | 1.80 (1.52, 2.13)   |
| ≥ 15                                                                                  | 256 (11.20)                                                                | 1.66 (1.44, 1.91)                | 298 (16.88)             | 2.05 (1.76, 2.39)   | 174 (19.8)              | 2.05 (1.70, 2.47)   |

<sup>a</sup> The denominators used to calculate the percentages (%) were the number of children who sat in the NAPLAN test (i.e., excluding children who were absent, exempt, or withdrawn from the test).

<sup>b</sup> The adjusted odds ratios (aORs) were derived from the multivariable logistic regression analyses controlling for school-level clustering effect and *all* the groups of confounders including child's sex, child's perinatal factors (gestational age, birthweight by gestation, plurality, Apgar score), maternal and familial socioeconomic factors (maternal parity, gestation of first antenatal care, maternal smoking, maternal age at child's birth, maternal country of birth, Aboriginality, maternal postcode-level residential socioeconomic status and remoteness at child's birth, and parental highest educational attainment), child's age at the NAPLAN test, and child's year of birth.



**Supplementary Table 13** Adjusted odds ratios (aOR) of children performing BNMS in numeracy in a NAPLAN test at Grade 3, 5, and 7 for children hospitalised with and without a chronic condition prior to the test

|                                                                                       | Below the National Minimum Standard (BNMS) in NAPLAN numeracy |                                  |                         |                     |                         |                     |
|---------------------------------------------------------------------------------------|---------------------------------------------------------------|----------------------------------|-------------------------|---------------------|-------------------------|---------------------|
|                                                                                       | Grade 3 cohort                                                |                                  | Grade 5 cohort          |                     | Grade 7 cohort          |                     |
|                                                                                       | N. (%) of children BNMS <sup>a</sup>                          | Adjusted OR (95%CI) <sup>b</sup> | N. (%) of children BNMS | Adjusted OR (95%CI) | N. (%) of children BNMS | Adjusted OR (95%CI) |
| <b>Children without recorded hospitalisations prior to testing (comparison group)</b> | 5001 (3.50)                                                   | Reference                        | 4232 (4.75)             | Reference           | 1102 (3.16)             | Reference           |
| <b>Children hospitalised without any chronic conditions (CC) prior to testing</b>     | 4864 (4.83)                                                   | 1.20 (1.14, 1.27)                | 4568 (6.35)             | 1.20 (1.13, 1.26)   | 1422 (4.51)             | 1.24 (1.13, 1.36)   |
| <b>Children hospitalised with a CC prior to testing</b>                               | 2619 (5.73)                                                   | 1.51 (1.43, 1.59)                | 2507 (7.70)             | 1.50 (1.41, 1.58)   | 802 (5.75)              | 1.58 (1.43, 1.74)   |
| <b>Total frequency of hospitalisations with a CC prior to testing</b>                 |                                                               |                                  |                         |                     |                         |                     |
| 1                                                                                     | 1555 (5.26)                                                   | 1.39 (1.31, 1.48)                | 1470 (7.03)             | 1.36 (1.27, 1.45)   | 458 (5.13)              | 1.42 (1.26, 1.60)   |
| 2-3                                                                                   | 666 (5.59)                                                    | 1.49 (1.37, 1.62)                | 689 (8.15)              | 1.64 (1.50, 1.80)   | 224 (6.23)              | 1.72 (1.47, 2.02)   |
| 4-6                                                                                   | 229 (8.21)                                                    | 2.14 (1.85, 2.47)                | 210 (10.14)             | 1.88 (1.59, 2.23)   | 66 (7.28)               | 1.98 (1.53, 2.57)   |
| ≥ 7                                                                                   | 169 (11.34)                                                   | 2.83 (2.37, 3.38)                | 138 (12.40)             | 2.31 (1.88, 2.85)   | 54 (10.63)              | 2.85 (2.05, 3.98)   |
| <b>Total duration of hospitalisations with a CC (bed-days) prior to testing</b>       |                                                               |                                  |                         |                     |                         |                     |
| 1-2                                                                                   | 1428 (4.98)                                                   | 1.40 (1.31, 1.49)                | 1356 (6.79)             | 1.40 (1.31, 1.50)   | 420 (5.09)              | 1.47 (1.30, 1.67)   |
| 3-4                                                                                   | 397 (5.51)                                                    | 1.39 (1.25, 1.55)                | 379 (7.35)              | 1.38 (1.23, 1.56)   | 125 (5.52)              | 1.46 (1.20, 1.78)   |
| 5-7                                                                                   | 316 (6.88)                                                    | 1.74 (1.53, 1.98)                | 290 (8.58)              | 1.58 (1.38, 1.82)   | 86 (5.78)               | 1.51 (1.19, 1.92)   |
| 8-14                                                                                  | 236 (7.82)                                                    | 1.83 (1.59, 2.10)                | 229 (9.95)              | 1.76 (1.51, 2.04)   | 84 (7.78)               | 2.04 (1.61, 2.59)   |
| ≥ 15                                                                                  | 242 (10.66)                                                   | 2.19 (1.88, 2.54)                | 253 (14.43)             | 2.29 (1.95, 2.69)   | 87 (10.15)              | 2.39 (1.84, 3.11)   |

<sup>a</sup> The denominators used to calculate the percentages (%) were the number of children who sat in the NAPLAN test (i.e., excluding children who were absent, exempt, or withdrawn from the test).

<sup>b</sup> The adjusted odds ratios (aORs) were derived from the multivariable logistic regression analyses controlling for school-level clustering effect and *all* the groups of confounders including child's sex, child's perinatal factors (gestational age, birthweight by gestation, plurality, Apgar score), maternal and familial socioeconomic factors (maternal parity, gestation of first antenatal care, maternal smoking, maternal age at child's birth, maternal country of birth, Aboriginality, maternal postcode-level residential socioeconomic status and remoteness at child's birth, and parental highest educational attainment), child's age at the NAPLAN test, and child's year of birth.

**Supplementary Table 14** Adjusted odds ratios (aOR) of children performing BNMS in reading in a NAPLAN test at Grade 3, 5, and 7 for children hospitalised with and without different types of chronic condition prior to the test

|                                                                                       | Below the National Minimum Standard (BNMS) in NAPLAN reading |                                  |                         |                     |                         |                     |
|---------------------------------------------------------------------------------------|--------------------------------------------------------------|----------------------------------|-------------------------|---------------------|-------------------------|---------------------|
|                                                                                       | Grade 3 cohort                                               |                                  | Grade 5 cohort          |                     | Grade 7 cohort          |                     |
|                                                                                       | N. (%) of children BNMS <sup>a</sup>                         | Adjusted OR (95%CI) <sup>b</sup> | N. (%) of children BNMS | Adjusted OR (95%CI) | N. (%) of children BNMS | Adjusted OR (95%CI) |
| <b>Children without recorded hospitalisations prior to testing (comparison group)</b> | 5319 (3.71)                                                  | Reference                        | 4955 (5.54)             | Reference           | 1520 (4.33)             | Reference           |
| <b>Children hospitalised without any chronic conditions (CC) prior to testing</b>     | 4999 (4.95)                                                  | 1.13 (1.08, 1.19)                | 5366 (7.42)             | 1.15 (1.09, 1.21)   | 2013 (6.33)             | 1.19 (1.10, 1.29)   |
| <b>Children hospitalised with a CC prior to testing</b>                               | 2588 (5.64)                                                  | 1.35 (1.28, 1.42)                | 2783 (8.51)             | 1.35 (1.28, 1.42)   | 1105 (7.85)             | 1.49 (1.38, 1.61)   |
| <b>Types of CC</b>                                                                    |                                                              |                                  |                         |                     |                         |                     |
| Mental health/behavioural                                                             | 217 (11.19)                                                  | 2.45 (2.09, 2.87)                | 255 (16.22)             | 2.45 (2.11, 2.84)   | 122 (14.01)             | 2.65 (2.14, 3.28)   |
| Cancer/blood disorders                                                                | 139 (7.04)                                                   | 1.44 (1.19, 1.73)                | 142 (9.99)              | 1.34 (1.11, 1.62)   | 48 (7.41)               | 1.24 (0.91, 1.68)   |
| Chronic infections                                                                    | 25 (8.80)                                                    | 1.93 (1.28, 2.91)                | 22 (9.65)               | 1.29 (0.83, 2.01)   | 10 (8.62)               | 1.37 (0.72, 2.60)   |
| Respiratory                                                                           | 1350 (5.66)                                                  | 1.26 (1.18, 1.35)                | 1403 (8.38)             | 1.24 (1.16, 1.32)   | 587 (8.26)              | 1.46 (1.33, 1.61)   |
| Metabolic <sup>c</sup>                                                                | 325 (5.30)                                                   | 1.30 (1.16, 1.47)                | 400 (8.58)              | 1.42 (1.27, 1.59)   | 153 (7.14)              | 1.39 (1.17, 1.66)   |
| Musculoskeletal/skin                                                                  | 192 (5.53)                                                   | 1.36 (1.17, 1.57)                | 231 (8.54)              | 1.37 (1.18, 1.58)   | 91 (6.56)               | 1.28 (1.04, 1.59)   |
| Neurological                                                                          | 896 (6.10)                                                   | 1.62 (1.51, 1.74)                | 945 (9.26)              | 1.62 (1.51, 1.75)   | 376 (9.19)              | 1.86 (1.65, 2.09)   |
| Cardiovascular                                                                        | 126 (7.05)                                                   | 1.66 (1.37, 2.02)                | 156 (11.77)             | 1.88 (1.56, 2.27)   | 60 (10.66)              | 2.06 (1.52, 2.80)   |
| Non-specific chronic condition                                                        | 147 (6.95)                                                   | 1.79 (1.50, 2.14)                | 165 (13.00)             | 2.23 (1.86, 2.67)   | 63 (12.50)              | 2.35 (1.78, 3.11)   |

<sup>a</sup> The denominators used to calculate the percentages (%) were the number of children who sat in the NAPLAN test (i.e., excluding children who were absent, exempt, or withdrawn from the test).

<sup>b</sup> The adjusted odds ratios (aORs) were derived from the multivariable logistic regression analyses controlling for school-level clustering effect and *all* the groups of confounders including child's sex, child's perinatal factors (gestational age, birthweight by gestation, plurality, Apgar score), maternal and familial socioeconomic factors (maternal parity, gestation of first antenatal care, maternal smoking, maternal age at child's birth, maternal country of birth, Aboriginality, maternal postcode-level residential socioeconomic status and remoteness at child's birth, and parental highest educational attainment), child's age at the NAPLAN test, and child's year of birth.

<sup>c</sup> Metabolic/endocrine/digestive/renal/genitourinary conditions

**Supplementary Table 15** Adjusted odds ratios (aOR) of children performing BNMS in writing in a NAPLAN test at Grade 3, 5, and 7 for children hospitalised with and without different types of chronic condition prior to the test

|                                                                                       | Below the National Minimum Standard (BNMS) in NAPLAN writing |                                  |                         |                     |                         |                     |
|---------------------------------------------------------------------------------------|--------------------------------------------------------------|----------------------------------|-------------------------|---------------------|-------------------------|---------------------|
|                                                                                       | Grade 3 cohort                                               |                                  | Grade 5 cohort          |                     | Grade 7 cohort          |                     |
|                                                                                       | N. (%) of children BNMS <sup>a</sup>                         | Adjusted OR (95%CI) <sup>b</sup> | N. (%) of children BNMS | Adjusted OR (95%CI) | N. (%) of children BNMS | Adjusted OR (95%CI) |
| <b>Children without recorded hospitalisations prior to testing (comparison group)</b> | 3387 (2.37)                                                  | Reference                        | 4915 (5.50)             | Reference           | 3125 (8.90)             | Reference           |
| <b>Children hospitalised without any chronic conditions (CC) prior to testing</b>     | 3448 (3.41)                                                  | 1.11 (1.04, 1.17)                | 5759 (7.97)             | 1.18 (1.12, 1.24)   | 4089 (12.85)            | 1.14 (1.08, 1.21)   |
| <b>Children hospitalised with a CC prior to testing</b>                               | 1911 (4.17)                                                  | 1.43 (1.34, 1.52)                | 3237 (9.91)             | 1.47 (1.40, 1.54)   | 2268 (16.07)            | 1.44 (1.36, 1.54)   |
| <b>Types of CC</b>                                                                    |                                                              |                                  |                         |                     |                         |                     |
| Mental health/behavioural                                                             | 240 (12.49)                                                  | 3.97 (3.40, 4.64)                | 369 (23.67)             | 3.66 (3.19, 4.20)   | 283 (31.98)             | 3.27 (2.77, 3.86)   |
| Cancer/blood disorders                                                                | 98 (4.97)                                                    | 1.47 (1.17, 1.84)                | 170 (11.90)             | 1.51 (1.27, 1.79)   | 94 (14.53)              | 1.27 (1.01, 1.59)   |
| Chronic infections                                                                    | 13 (4.56)                                                    | 1.15 (0.65, 2.06)                | 33 (14.54)              | 2.03 (1.37, 3.01)   | 29 (25.22)              | 2.49 (1.60, 3.88)   |
| Respiratory                                                                           | 975 (4.08)                                                   | 1.30 (1.20, 1.40)                | 1618 (9.69)             | 1.32 (1.24, 1.41)   | 1152 (16.19)            | 1.35 (1.25, 1.46)   |
| Metabolic <sup>c</sup>                                                                | 235 (3.84)                                                   | 1.29 (1.12, 1.49)                | 440 (9.45)              | 1.45 (1.31, 1.60)   | 318 (14.78)             | 1.33 (1.17, 1.52)   |
| Musculoskeletal/skin                                                                  | 158 (4.55)                                                   | 1.71 (1.45, 2.02)                | 264 (9.75)              | 1.53 (1.32, 1.76)   | 199 (14.38)             | 1.37 (1.17, 1.61)   |
| Neurological                                                                          | 680 (4.63)                                                   | 1.78 (1.62, 1.95)                | 1152 (11.30)            | 1.86 (1.73, 2.00)   | 736 (17.90)             | 1.71 (1.57, 1.86)   |
| Cardiovascular                                                                        | 101 (5.65)                                                   | 1.98 (1.60, 2.46)                | 150 (11.42)             | 1.61 (1.34, 1.94)   | 116 (20.90)             | 2.08 (1.67, 2.59)   |
| Non-specific chronic condition                                                        | 122 (5.78)                                                   | 2.16 (1.78, 2.63)                | 187 (14.76)             | 2.42 (2.04, 2.87)   | 119 (23.56)             | 2.20 (1.76, 2.76)   |

<sup>a</sup> The denominators used to calculate the percentages (%) were the number of children who sat in the NAPLAN test (i.e., excluding children who were absent, exempt, or withdrawn from the test).

<sup>b</sup> The adjusted odds ratios (aORs) were derived from the multivariable logistic regression analyses controlling for school-level clustering effect and *all* the groups of confounders including child's sex, child's perinatal factors (gestational age, birthweight by gestation, plurality, Apgar score), maternal and familial socioeconomic factors (maternal parity, gestation of first antenatal care, maternal smoking, maternal age at child's birth, maternal country of birth, Aboriginality, maternal postcode-level residential socioeconomic status and remoteness at child's birth, and parental highest educational attainment), child's age at the NAPLAN test, and child's year of birth.

<sup>c</sup> Metabolic/endocrine/digestive/renal/genitourinary conditions

**Supplementary Table 16** Adjusted odds ratios (aOR) of children performing BNMS in spelling in a NAPLAN test at Grade 3, 5, and 7 for children hospitalised with and without different types of chronic condition prior to the test

|                                                                                       | Below the National Minimum Standard (BNMS) in NAPLAN spelling |                                  |                         |                     |                         |                     |
|---------------------------------------------------------------------------------------|---------------------------------------------------------------|----------------------------------|-------------------------|---------------------|-------------------------|---------------------|
|                                                                                       | Grade 3 cohort                                                |                                  | Grade 5 cohort          |                     | Grade 7 cohort          |                     |
|                                                                                       | N. (%) of children BNMS <sup>a</sup>                          | Adjusted OR (95%CI) <sup>b</sup> | N. (%) of children BNMS | Adjusted OR (95%CI) | N. (%) of children BNMS | Adjusted OR (95%CI) |
| <b>Children without recorded hospitalisations prior to testing (comparison group)</b> | 5080 (3.54)                                                   | Reference                        | 3883 (4.34)             | Reference           | 1802 (5.13)             | Reference           |
| <b>Children hospitalised without any chronic conditions (CC) prior to testing</b>     | 5158 (5.10)                                                   | 1.17 (1.11, 1.22)                | 4632 (6.40)             | 1.24 (1.18, 1.31)   | 2438 (7.65)             | 1.21 (1.12, 1.30)   |
| <b>Children hospitalised with a CC prior to testing</b>                               | 2702 (5.88)                                                   | 1.40 (1.34, 1.47)                | 2451 (7.48)             | 1.42 (1.35, 1.50)   | 1317 (9.30)             | 1.46 (1.35, 1.57)   |
| <b>Types of CC</b>                                                                    |                                                               |                                  |                         |                     |                         |                     |
| Mental health/behavioural                                                             | 253 (13.02)                                                   | 2.79 (2.41, 3.22)                | 242 (15.34)             | 2.60 (2.21, 3.07)   | 178 (19.91)             | 3.08 (2.52, 3.75)   |
| Cancer/blood disorders                                                                | 129 (6.52)                                                    | 1.28 (1.04, 1.57)                | 125 (8.74)              | 1.40 (1.15, 1.71)   | 47 (7.24)               | 1.04 (0.76, 1.41)   |
| Chronic infections                                                                    | 26 (9.15)                                                     | 1.91 (1.28, 2.83)                | 24 (10.43)              | 1.72 (1.10, 2.69)   | 9 (7.69)                | 1.01 (0.53, 1.91)   |
| Respiratory                                                                           | 1451 (6.06)                                                   | 1.36 (1.28, 1.45)                | 1232 (7.35)             | 1.30 (1.21, 1.39)   | 656 (9.18)              | 1.35 (1.23, 1.48)   |
| Metabolic <sup>c</sup>                                                                | 353 (5.75)                                                    | 1.42 (1.27, 1.59)                | 332 (7.11)              | 1.40 (1.25, 1.56)   | 194 (8.98)              | 1.42 (1.22, 1.65)   |
| Musculoskeletal/skin                                                                  | 228 (6.55)                                                    | 1.64 (1.43, 1.89)                | 204 (7.51)              | 1.47 (1.27, 1.71)   | 111 (7.95)              | 1.27 (1.05, 1.55)   |
| Neurological                                                                          | 915 (6.22)                                                    | 1.63 (1.51, 1.76)                | 860 (8.41)              | 1.73 (1.60, 1.88)   | 455 (11.03)             | 1.81 (1.62, 2.03)   |
| Cardiovascular                                                                        | 130 (7.25)                                                    | 1.69 (1.40, 2.04)                | 128 (9.73)              | 1.82 (1.48, 2.23)   | 67 (11.96)              | 1.96 (1.50, 2.55)   |
| Non-specific chronic condition                                                        | 171 (8.05)                                                    | 2.04 (1.71, 2.43)                | 144 (11.29)             | 2.22 (1.82, 2.72)   | 77 (15.04)              | 2.33 (1.73, 3.13)   |

<sup>a</sup> The denominators used to calculate the percentages (%) were the number of children who sat in the NAPLAN test (i.e., excluding children who were absent, exempt, or withdrawn from the test).

<sup>b</sup> The adjusted odds ratios (aORs) were derived from the multivariable logistic regression analyses controlling for school-level clustering effect and *all* the groups of confounders including child's sex, child's perinatal factors (gestational age, birthweight by gestation, plurality, Apgar score), maternal and familial socioeconomic factors (maternal parity, gestation of first antenatal care, maternal smoking, maternal age at child's birth, maternal country of birth, Aboriginality, maternal postcode-level residential socioeconomic status and remoteness at child's birth, and parental highest educational attainment), child's age at the NAPLAN test, and child's year of birth.

<sup>c</sup> Metabolic/endocrine/digestive/renal/genitourinary conditions

**Supplementary Table 17** Adjusted odds ratios (aOR) of children performing BNMS in grammar & punctuation in a NAPLAN test at Grade 3, 5, and 7 for children hospitalised with and without different types of chronic condition prior to the test

|                                                                                       | <b>Below the National Minimum Standard (BNMS) in NAPLAN grammar &amp; punctuation</b> |                                  |                         |                     |                         |                     |
|---------------------------------------------------------------------------------------|---------------------------------------------------------------------------------------|----------------------------------|-------------------------|---------------------|-------------------------|---------------------|
|                                                                                       | <b>Grade 3 cohort</b>                                                                 |                                  | <b>Grade 5 cohort</b>   |                     | <b>Grade 7 cohort</b>   |                     |
|                                                                                       | N. (%) of children BNMS <sup>a</sup>                                                  | Adjusted OR (95%CI) <sup>b</sup> | N. (%) of children BNMS | Adjusted OR (95%CI) | N. (%) of children BNMS | Adjusted OR (95%CI) |
| <b>Children without recorded hospitalisations prior to testing (comparison group)</b> | 6829 (4.76)                                                                           | Reference                        | 5147 (5.75)             | Reference           | 2735 (7.78)             | Reference           |
| <b>Children hospitalised without any chronic conditions (CC) prior to testing</b>     | 6713 (6.63)                                                                           | 1.16 (1.11, 1.21)                | 5913 (8.17)             | 1.22 (1.16, 1.28)   | 3530 (11.07)            | 1.21 (1.14, 1.28)   |
| <b>Children hospitalised with a CC prior to testing</b>                               | 3310 (7.20)                                                                           | 1.32 (1.26, 1.38)                | 3180 (9.71)             | 1.45 (1.38, 1.53)   | 1908 (13.47)            | 1.47 (1.38, 1.56)   |
| <b>Types of CC</b>                                                                    |                                                                                       |                                  |                         |                     |                         |                     |
| Mental health/behavioural                                                             | 276 (14.20)                                                                           | 2.44 (2.12, 2.80)                | 305 (19.33)             | 2.80 (2.40, 3.26)   | 213 (23.83)             | 2.76 (2.30, 3.30)   |
| Cancer/blood disorders                                                                | 168 (8.49)                                                                            | 1.32 (1.11, 1.56)                | 184 (12.86)             | 1.66 (1.40, 1.96)   | 75 (11.56)              | 1.16 (0.90, 1.50)   |
| Chronic infections                                                                    | 20 (7.04)                                                                             | 1.02 (0.65, 1.62)                | 29 (12.61)              | 1.58 (1.06, 2.38)   | 23 (19.66)              | 2.12 (1.32, 3.41)   |
| Respiratory                                                                           | 1747 (7.30)                                                                           | 1.26 (1.19, 1.33)                | 1592 (9.50)             | 1.31 (1.23, 1.40)   | 959 (13.42)             | 1.36 (1.26, 1.47)   |
| Metabolic <sup>c</sup>                                                                | 381 (6.21)                                                                            | 1.14 (1.02, 1.26)                | 418 (8.95)              | 1.38 (1.24, 1.54)   | 278 (12.87)             | 1.44 (1.26, 1.65)   |
| Musculoskeletal/skin                                                                  | 251 (7.21)                                                                            | 1.36 (1.20, 1.55)                | 253 (9.31)              | 1.40 (1.21, 1.61)   | 165 (11.82)             | 1.35 (1.13, 1.61)   |
| Neurological                                                                          | 1127 (7.66)                                                                           | 1.57 (1.47, 1.68)                | 1068 (10.45)            | 1.74 (1.61, 1.87)   | 637 (15.44)             | 1.77 (1.61, 1.96)   |
| Cardiovascular                                                                        | 162 (9.03)                                                                            | 1.61 (1.35, 1.92)                | 162 (12.31)             | 1.78 (1.48, 2.15)   | 90 (16.07)              | 1.82 (1.45, 2.29)   |
| Non-specific chronic condition                                                        | 190 (8.94)                                                                            | 1.82 (1.54, 2.14)                | 176 (13.80)             | 2.17 (1.81, 2.60)   | 101 (19.73)             | 2.19 (1.76, 2.72)   |

<sup>a</sup> The denominators used to calculate the percentages (%) were the number of children who sat in the NAPLAN test (i.e., excluding children who were absent, exempt, or withdrawn from the test).

<sup>b</sup> The adjusted odds ratios (aORs) were derived from the multivariable logistic regression analyses controlling for school-level clustering effect and *all* the groups of confounders including child's sex, child's perinatal factors (gestational age, birthweight by gestation, plurality, Apgar score), maternal and familial socioeconomic factors (maternal parity, gestation of first antenatal care, maternal smoking, maternal age at child's birth, maternal country of birth, Aboriginality, maternal postcode-level residential socioeconomic status and remoteness at child's birth, and parental highest educational attainment), child's age at the NAPLAN test, and child's year of birth.

<sup>c</sup> Metabolic/endocrine/digestive/renal/genitourinary conditions

**Supplementary Table 18** Adjusted odds ratios (aOR) of children performing BNMS in numeracy in a NAPLAN test at Grade 3, 5, and 7 for children hospitalised with and without different types of chronic condition prior to the test

|                                                                                       | Below the National Minimum Standard (BNMS) in NAPLAN numeracy |                                  |                         |                     |                         |                     |
|---------------------------------------------------------------------------------------|---------------------------------------------------------------|----------------------------------|-------------------------|---------------------|-------------------------|---------------------|
|                                                                                       | Grade 3 cohort                                                |                                  | Grade 5 cohort          |                     | Grade 7 cohort          |                     |
|                                                                                       | N. (%) of children BNMS <sup>a</sup>                          | Adjusted OR (95%CI) <sup>b</sup> | N. (%) of children BNMS | Adjusted OR (95%CI) | N. (%) of children BNMS | Adjusted OR (95%CI) |
| <b>Children without recorded hospitalisations prior to testing (comparison group)</b> | 5001 (3.50)                                                   | Reference                        | 4232 (4.75)             | Reference           | 1102 (3.16)             | Reference           |
| <b>Children hospitalised without any chronic conditions (CC) prior to testing</b>     | 4864 (4.83)                                                   | 1.20 (1.14, 1.27)                | 4568 (6.35)             | 1.20 (1.13, 1.26)   | 1422 (4.51)             | 1.24 (1.13, 1.36)   |
| <b>Children hospitalised with a CC prior to testing</b>                               | 2619 (5.73)                                                   | 1.51 (1.43, 1.59)                | 2507 (7.70)             | 1.50 (1.41, 1.58)   | 802 (5.75)              | 1.58 (1.43, 1.74)   |
| <b>Types of CC</b>                                                                    |                                                               |                                  |                         |                     |                         |                     |
| Mental health/behavioural                                                             | 242 (12.47)                                                   | 3.07 (2.65, 3.58)                | 274 (17.54)             | 3.59 (3.07, 4.21)   | 104 (11.89)             | 3.40 (2.70, 4.27)   |
| Cancer/blood disorders                                                                | 129 (6.57)                                                    | 1.41 (1.17, 1.70)                | 132 (9.27)              | 1.50 (1.24, 1.81)   | 39 (6.12)               | 1.51 (1.07, 2.14)   |
| Chronic infections                                                                    | 24 (8.48)                                                     | 1.95 (1.29, 2.95)                | 23 (10.13)              | 1.74 (1.08, 2.79)   | 11 (9.48)               | 2.49 (1.34, 4.62)   |
| Respiratory                                                                           | 1348 (5.67)                                                   | 1.40 (1.31, 1.49)                | 1232 (7.41)             | 1.34 (1.25, 1.44)   | 401 (5.70)              | 1.46 (1.29, 1.65)   |
| Metabolic <sup>c</sup>                                                                | 363 (5.94)                                                    | 1.62 (1.45, 1.81)                | 330 (7.10)              | 1.44 (1.28, 1.62)   | 112 (5.27)              | 1.53 (1.27, 1.85)   |
| Musculoskeletal/skin                                                                  | 208 (6.01)                                                    | 1.62 (1.39, 1.89)                | 209 (7.75)              | 1.47 (1.26, 1.71)   | 76 (5.55)               | 1.58 (1.22, 2.04)   |
| Neurological                                                                          | 942 (6.42)                                                    | 1.90 (1.76, 2.05)                | 886 (8.72)              | 1.89 (1.74, 2.06)   | 283 (7.00)              | 2.05 (1.80, 2.34)   |
| Cardiovascular                                                                        | 134 (7.53)                                                    | 1.83 (1.51, 2.22)                | 168 (12.78)             | 2.42 (2.02, 2.90)   | 40 (7.33)               | 2.04 (1.43, 2.90)   |
| Non-specific chronic condition                                                        | 172 (8.12)                                                    | 2.35 (1.99, 2.78)                | 154 (12.21)             | 2.34 (1.94, 2.83)   | 54 (10.80)              | 2.78 (2.07, 3.75)   |

<sup>a</sup> The denominators used to calculate the percentages (%) were the number of children who sat in the NAPLAN test (i.e., excluding children who were absent, exempt, or withdrawn from the test).

<sup>b</sup> The adjusted odds ratios (aORs) were derived from the multivariable logistic regression analyses controlling for school-level clustering effect and *all* the groups of confounders including child's sex, child's perinatal factors (gestational age, birthweight by gestation, plurality, Apgar score), maternal and familial socioeconomic factors (maternal parity, gestation of first antenatal care, maternal smoking, maternal age at child's birth, maternal country of birth, Aboriginality, maternal postcode-level residential socioeconomic status and remoteness at child's birth, and parental highest educational attainment), child's age at the NAPLAN test, and child's year of birth.

<sup>c</sup> Metabolic/endocrine/digestive/renal/genitourinary conditions

**Supplementary Table 19** Percentage (%) of children performing BNMS in **reading** in a NAPLAN test at Grade 3, 5, and 7 for children hospitalised with different length of duration by types of chronic conditions

| Total duration of hospitalisations with a CC (bed-days) prior to testing | Grade 3 cohort                       | Grade 5 cohort          | Grade 7 cohort          |
|--------------------------------------------------------------------------|--------------------------------------|-------------------------|-------------------------|
|                                                                          | N. (%) of children BNMS <sup>a</sup> | N. (%) of children BNMS | N. (%) of children BNMS |
| <b>Mental health/behavioural</b>                                         |                                      |                         |                         |
| 1-2                                                                      | 128 (13.05)                          | 146 (18.84)             | 61 (14.63)              |
| 3-7                                                                      | 52 (7.41)                            | 68 (12.39)              | 34 (11.56)              |
| ≥ 8                                                                      | 37 (14.45)                           | 41 (16.53)              | 27 (16.88)              |
| <b>Cancer/blood disorders</b>                                            |                                      |                         |                         |
| 1-2                                                                      | 34 (5.13)                            | 29 (6.03)               | 8 (3.92)                |
| 3-7                                                                      | 64 (9.88)                            | 54 (11.87)              | 22 (9.95)               |
| ≥ 8                                                                      | 41 (6.18)                            | 59 (12.14)              | 18 (8.07)               |
| <b>Respiratory</b>                                                       |                                      |                         |                         |
| 1-2                                                                      | 860 (5.13)                           | 874 (7.59)              | 363 (7.61)              |
| 3-7                                                                      | 345 (6.32)                           | 357 (9.03)              | 147 (8.46)              |
| ≥ 8                                                                      | 145 (8.83)                           | 172 (13.53)             | 77 (12.92)              |
| <b>Metabolic</b>                                                         |                                      |                         |                         |
| 1-2                                                                      | 160 (4.61)                           | 206 (7.88)              | 72 (6.23)               |
| 3-7                                                                      | 96 (5.84)                            | 93 (7.52)               | 44 (7.47)               |
| ≥ 8                                                                      | 69 (6.79)                            | 101 (12.45)             | 37 (9.3)                |
| <b>Musculoskeletal/skin<sup>b</sup></b>                                  |                                      |                         |                         |
| 1-2                                                                      | 99 (5.18)                            | 116 (7.6)               | 47 (6.08)               |
| 3-7                                                                      | 47 (5.27)                            | 55 (8.1)                | 20 (5.73)               |
| ≥ 8                                                                      | 46 (6.85)                            | 60 (12.02)              | 24 (9.06)               |
| <b>Neurological</b>                                                      |                                      |                         |                         |
| 1-2                                                                      | 621 (5.62)                           | 631 (8.43)              | 241 (8.28)              |
| 3-7                                                                      | 161 (6.17)                           | 190 (9.89)              | 84 (10.69)              |
| ≥ 8                                                                      | 114 (10.99)                          | 124 (15.6)              | 51 (13.01)              |
| <b>Cardiovascular</b>                                                    |                                      |                         |                         |
| 1-2                                                                      | 25 (5.56)                            | 27 (8.39)               | 9 (6.34)                |
| 3-7                                                                      | 39 (6.85)                            | 45 (10.44)              | 19 (10.67)              |
| ≥ 8                                                                      | 62 (8.07)                            | 84 (14.69)              | 32 (13.17)              |
| <b>Non-specific chronic condition</b>                                    |                                      |                         |                         |
| 1-2                                                                      | 48 (6.91)                            | 57 (12.78)              | 24 (14.2)               |
| 3-7                                                                      | 52 (5.33)                            | 54 (9.73)               | 23 (10.8)               |
| ≥ 8                                                                      | 47 (10.56)                           | 54 (20.15)              | 16 (13.11)              |

<sup>a</sup> The denominators used to calculate the percentages (%) were the number of children who sat in the NAPLAN test (i.e., excluding children who were absent, exempt, or withdrawn from the test).

<sup>b</sup> Metabolic/endocrine/digestive/renal/genitourinary conditions

**Supplementary Table 20** Percentage (%) of children performing BNMS in numeracy in a NAPLAN test at Grade 3, 5, and 7 for children hospitalised with different length of duration by types of chronic conditions

| Total duration of hospitalisations with a CC (bed-days) prior to testing | Grade 3 cohort                       | Grade 5 cohort          | Grade 7 cohort          |
|--------------------------------------------------------------------------|--------------------------------------|-------------------------|-------------------------|
|                                                                          | N. (%) of children BNMS <sup>a</sup> | N. (%) of children BNMS | N. (%) of children BNMS |
| <b>Mental health/behavioural</b>                                         |                                      |                         |                         |
| 1-2                                                                      | 137 (13.92)                          | 155 (19.97)             | 53 (12.62)              |
| 3-7                                                                      | 69 (9.84)                            | 72 (13.24)              | 25 (8.5)                |
| ≥ 8                                                                      | 36 (14.06)                           | 47 (19.42)              | 26 (16.15)              |
| <b>Cancer/blood disorders</b>                                            |                                      |                         |                         |
| 1-2                                                                      | 22 (3.33)                            | 21 (4.38)               | 7 (3.54)                |
| 3-7                                                                      | 65 (10.08)                           | 52 (11.35)              | 20 (9.09)               |
| ≥ 8                                                                      | 42 (6.39)                            | 59 (12.14)              | 12 (5.48)               |
| <b>Respiratory</b>                                                       |                                      |                         |                         |
| 1-2                                                                      | 809 (4.85)                           | 756 (6.6)               | 245 (5.18)              |
| 3-7                                                                      | 360 (6.64)                           | 324 (8.24)              | 98 (5.7)                |
| ≥ 8                                                                      | 179 (10.87)                          | 152 (12.09)             | 58 (9.88)               |
| <b>Metabolic</b>                                                         |                                      |                         |                         |
| 1-2                                                                      | 191 (5.5)                            | 172 (6.6)               | 60 (5.24)               |
| 3-7                                                                      | 100 (6.1)                            | 79 (6.42)               | 24 (4.07)               |
| ≥ 8                                                                      | 72 (7.18)                            | 79 (9.71)               | 28 (7.14)               |
| <b>Musculoskeletal/skin<sup>b</sup></b>                                  |                                      |                         |                         |
| 1-2                                                                      | 99 (5.2)                             | 91 (6)                  | 37 (4.84)               |
| 3-7                                                                      | 52 (5.88)                            | 62 (9.16)               | 14 (4.08)               |
| ≥ 8                                                                      | 57 (8.46)                            | 56 (11.16)              | 25 (9.58)               |
| <b>Neurological</b>                                                      |                                      |                         |                         |
| 1-2                                                                      | 611 (5.54)                           | 574 (7.7)               | 170 (5.9)               |
| 3-7                                                                      | 219 (8.4)                            | 190 (9.9)               | 64 (8.17)               |
| ≥ 8                                                                      | 112 (10.83)                          | 122 (15.4)              | 49 (12.83)              |
| <b>Cardiovascular</b>                                                    |                                      |                         |                         |
| 1-2                                                                      | 22 (4.93)                            | 30 (9.38)               | 10 (7.19)               |
| 3-7                                                                      | 32 (5.57)                            | 47 (11.01)              | 13 (7.51)               |
| ≥ 8                                                                      | 80 (10.53)                           | 91 (16.02)              | 17 (7.26)               |
| <b>Non-specific chronic condition</b>                                    |                                      |                         |                         |
| 1-2                                                                      | 58 (8.29)                            | 56 (12.56)              | 25 (14.62)              |
| 3-7                                                                      | 54 (5.53)                            | 53 (9.72)               | 18 (8.61)               |
| ≥ 8                                                                      | 60 (13.61)                           | 45 (16.67)              | 11 (9.17)               |

<sup>a</sup> The denominators used to calculate the percentages (%) were the number of children who sat in the NAPLAN test (i.e., excluding children who were absent, exempt, or withdrawn from the test).

<sup>b</sup> Metabolic/endocrine/digestive/renal/genitourinary conditions



**References**

1. Centre for Health Record Linkage (CHeReL). Master Linkage Key Quality Assurance. 2012. <https://www.cherel.org.au/quality-assurance>.
2. ACARA. National Assessment Program – Literacy and Numeracy 2013: Technical Report. Sydney, Australia: Australian Curriculum, Assessment and Reporting Authority, 2014.
3. Houg B, Justman M. NAPLAN Scores as Predictors of Access to Higher Education in Victoria. Australia: Melbourne: University of Melbourne, 2014.
4. Hardelid P, Dattani N, Gilbert R. Estimating the prevalence of chronic conditions in children who die in England, Scotland and Wales: a data linkage cohort study. *BMJ Open* 2014; **4**(8): e005331.
